# Supplementary material
Source: publisher figshare collection journal article supplement (https://tandf.figshare.com/ndownloader/files/30775259)

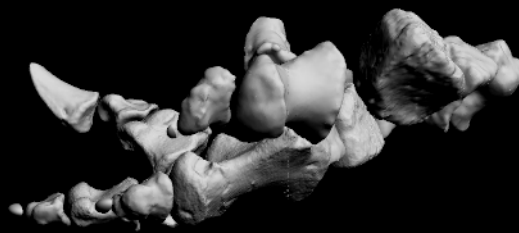

[Click to activate](#)

Supplement: Supplementary file 1 [file 30775259]
